# Supplementary material for: The mechanism of electrochemical reduction of hydrogen peroxide on silver nanoparticles
Source: Royal Society of Chemistry journal article supplement (doi:10.1039/c7cp07492a), 2017-12-11
Supplement: c7cp07492a1.pdf [file c7cp07492a1.pdf]

**Supporting Information: The Mechanism of Electrochemical Reduction of Hydrogen Peroxide on Silver Nanoparticles**

Xiaosheng Cai,<sup>1</sup> Eden E. L. Tanner,<sup>2</sup> Chuhong Lin,<sup>2</sup> Kamonwad Ngamchuea,<sup>2</sup> John S. Foord,<sup>1</sup> and Richard G. Compton\*<sup>2</sup>

<sup>1</sup>Department of Chemistry, Chemistry Research Laboratory, University of Oxford, Mansfield Road, Oxford, OX1 3TA, United Kingdom.

<sup>2</sup>Department of Chemistry, Physical and Theoretical Chemistry Laboratory, University of Oxford, South Parks Road, Oxford OX1 3QZ, United Kingdom.

\*Corresponding Author:

Emails: [richard.compton@chem.ox.ac.uk](mailto:richard.compton@chem.ox.ac.uk)

Phone: +44(0) 1865 275957

Fax: +44 (0) 1865 275410

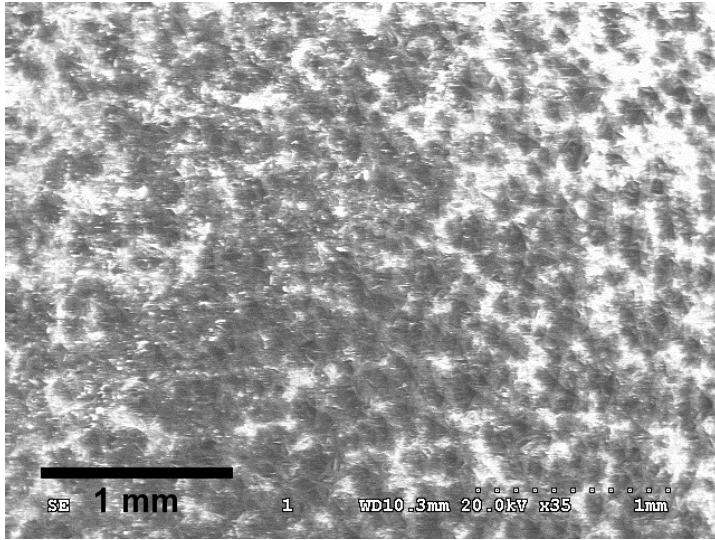

*Figure S1. SEM of AgNPs-BDDE under 35x magnification.*

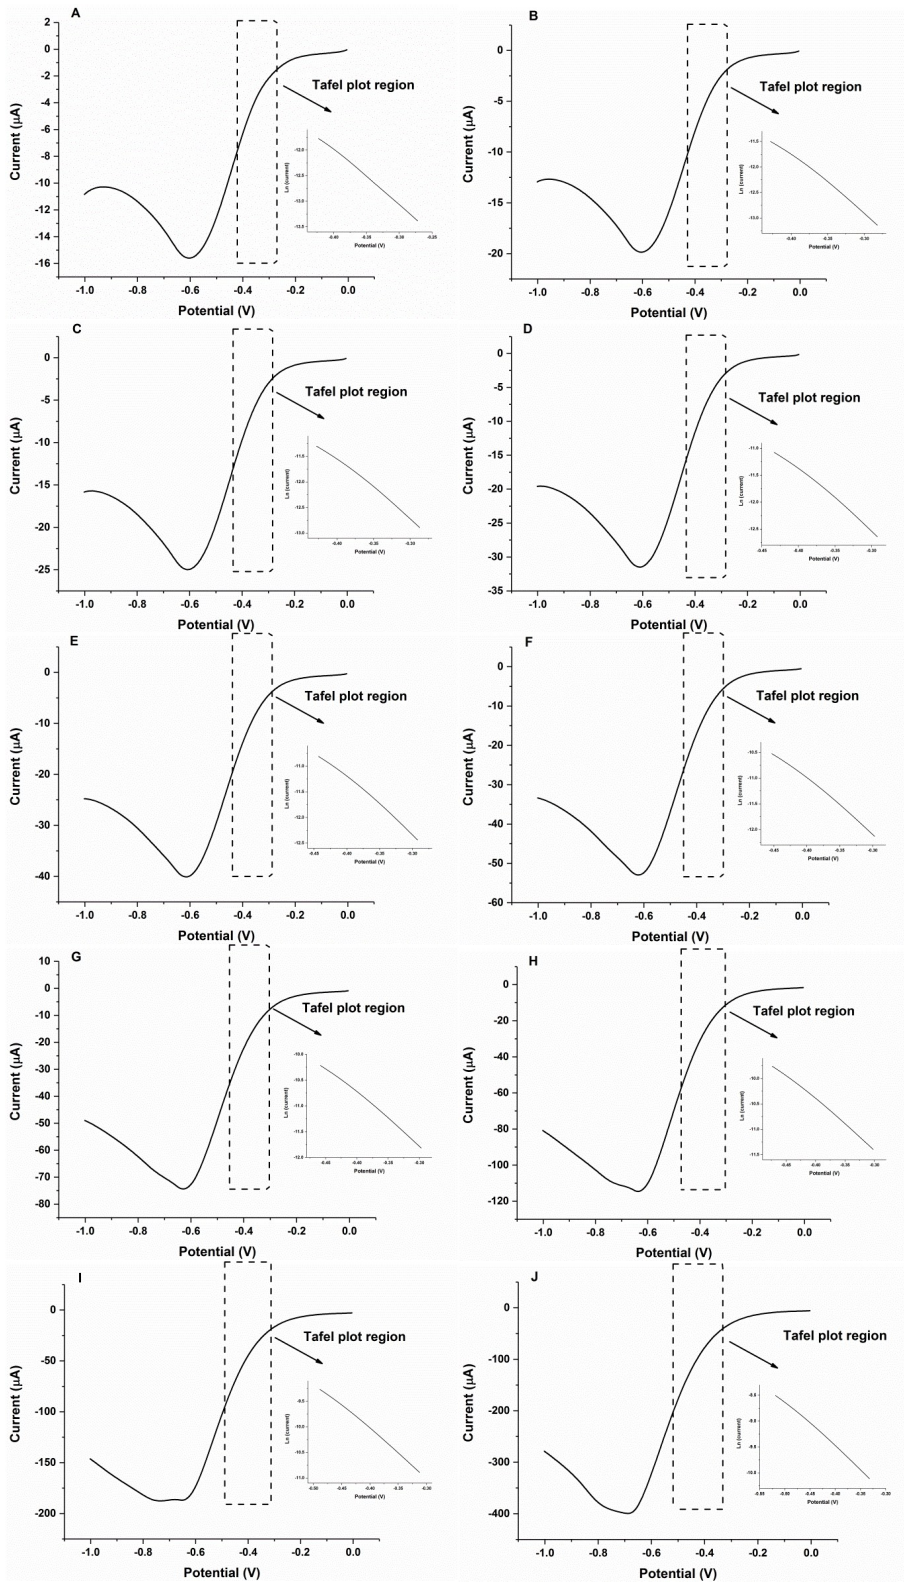

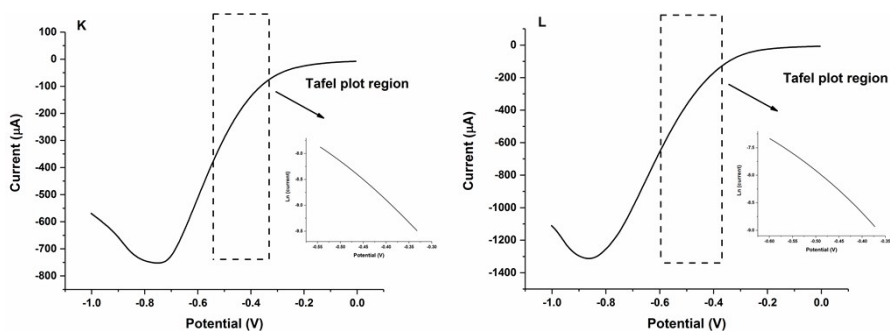

Figure S2. Tafel plots for AgNPs-BDDE recorded at a scan rate of  $0.05 \text{ V s}^{-1}$  with variable  $\text{H}_2\text{O}_2$  concentrations of 0.01 mM (A), 0.02 mM (B), 0.04 mM (C), 0.08 mM (D), 0.16 mM (E), 0.32 mM (F), 0.64 mM (G), 1.2 mM (H), 2.4 mM (I), 4.8 mM (J), 9.6 mM (K), and 19.2 mM (L).

Table S1. The measured transfer coefficient ( $\alpha = 0.26 \pm 0.04$ ) according to the Tafel slopes with the increasing  $\text{H}_2\text{O}_2$  concentration for AgNPs-BDDE recorded at a scan rate of  $0.05 \text{ V s}^{-1}$ .

| $\text{H}_2\text{O}_2$ concentration (mM) | Tafel slope       | $\alpha$          | $\alpha$ (average) |
|-------------------------------------------|-------------------|-------------------|--------------------|
| 0.01                                      | $-10.38 \pm 0.38$ | $0.27 \pm 0.0097$ | $0.26 \pm 0.04$    |
| 0.02                                      | $-11.20 \pm 0.22$ | $0.29 \pm 0.0057$ |                    |
| 0.04                                      | $-11.17 \pm 0.23$ | $0.29 \pm 0.0059$ |                    |
| 0.08                                      | $-10.90 \pm 0.24$ | $0.28 \pm 0.0062$ |                    |
| 0.16                                      | $-10.52 \pm 0.34$ | $0.27 \pm 0.0086$ |                    |
| 0.32                                      | $-10.05 \pm 0.38$ | $0.26 \pm 0.0098$ |                    |
| 0.64                                      | $-9.64 \pm 0.45$  | $0.25 \pm 0.011$  |                    |
| 1.2                                       | $-9.24 \pm 0.47$  | $0.24 \pm 0.012$  |                    |
| 2.4                                       | $-8.87 \pm 0.55$  | $0.23 \pm 0.014$  |                    |
| 4.8                                       | $-8.29 \pm 0.39$  | $0.21 \pm 0.010$  |                    |
| 9.6                                       | $-7.42 \pm 0.38$  | $0.19 \pm 0.010$  |                    |
| 19.2                                      | $-6.86 \pm 0.34$  | $0.18 \pm 0.010$  |                    |

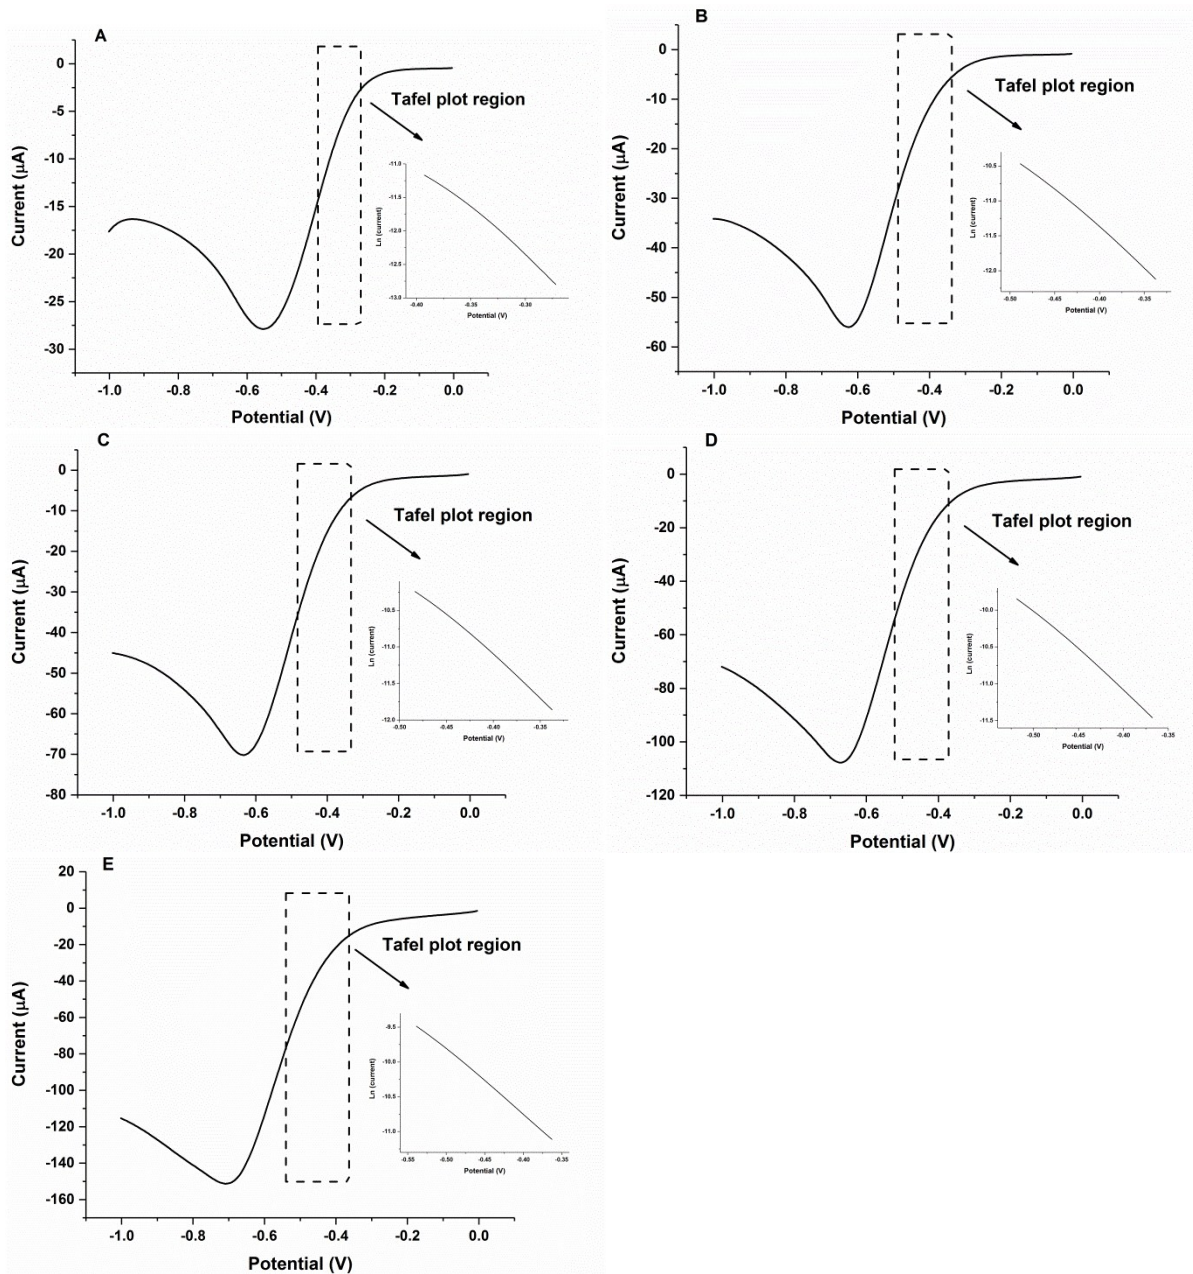

Figure S3. Tafel plots for AgNPs-BDDE in air-saturated PBS solution recorded at different scan rates of  $0.01 \text{ V s}^{-1}$  (A),  $0.025 \text{ V s}^{-1}$  (B),  $0.05 \text{ V s}^{-1}$  (C),  $0.1 \text{ V s}^{-1}$  (D), and  $0.2 \text{ V s}^{-1}$  (E).

Table S2. The measured transfer coefficient ( $\alpha = 0.28 \pm 0.03$ ) according to the Tafel slopes from 0.01 to 0.2 V s<sup>-1</sup> for AgNPs-BDDE in air-saturated PBS solution.

| Scan rate (V s <sup>-1</sup> ) | Tafel slope   | $\alpha$      | $\alpha$ (average) |
|--------------------------------|---------------|---------------|--------------------|
| 0.01                           | -13.13 ± 0.74 | 0.34 ± 0.019  | 0.28 ± 0.03        |
| 0.025                          | -11.32 ± 0.31 | 0.29 ± 0.0079 |                    |
| 0.05                           | -10.62 ± 0.63 | 0.27 ± 0.016  |                    |
| 0.1                            | -10.57 ± 0.19 | 0.27 ± 0.0049 |                    |
| 0.2                            | -9.55 ± 0.18  | 0.25 ± 0.0045 |                    |
